# Supplementary material for: Soil microbial biomass, activity and community composition along altitudinal gradients in the High Arctic (Billefjorden, Svalbard)
Source: Copernicus journal article supplement (doi:10.5194/bg-2017-184), 2017-06-12

1  
2  
3  
4  
5  
6  
7  
8  
9  
10  
11  
12  
13

**Figure S1**

Time series of daily means of soil temperatures at -5 cm (a) and of air temperatures at 2 m (b) from AWS<sub>25</sub> (25 m a.s.l.) and AWS<sub>495</sub> (495 m a.s.l.) meteorological stations from May 2012 to September 2013.

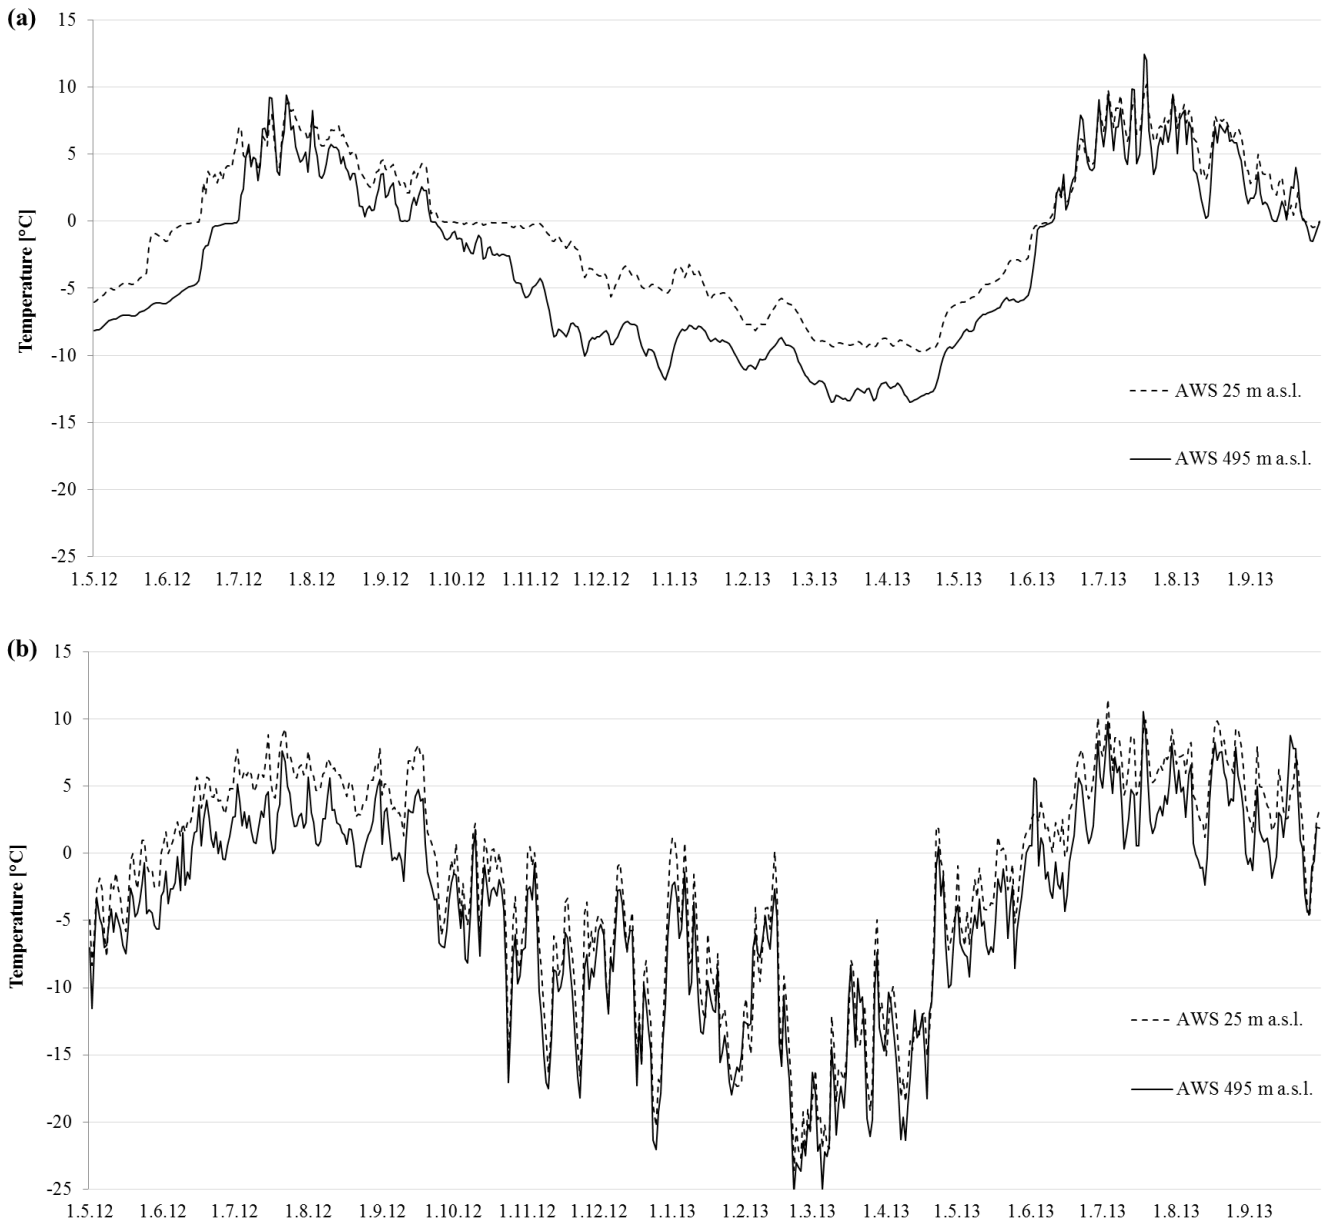

14  
15  
16  
17  
18  
19  
20  
21

**Figure S2**

Time series of mean  $\pm$  SD ( $n = 3$ ) soil water content at -5 cm from AWS<sub>25</sub> (25 m a.s.l.) and AWS<sub>495</sub> (495 m a.s.l.) for three consecutive summer seasons (2011–2013). The grey area indicates time of sample collection in 2012. Note the stable soil water content from July until September. The volumetric measurement enable to determine soil water content only in a liquid state, which explains the very low water content in frozen soils during the winter period. These technical limitations explain also conspicuous fluctuations of soil water content during transient periods between winter and summer season, resulting from freeze–thaw cycles when temperature oscillated around zero.

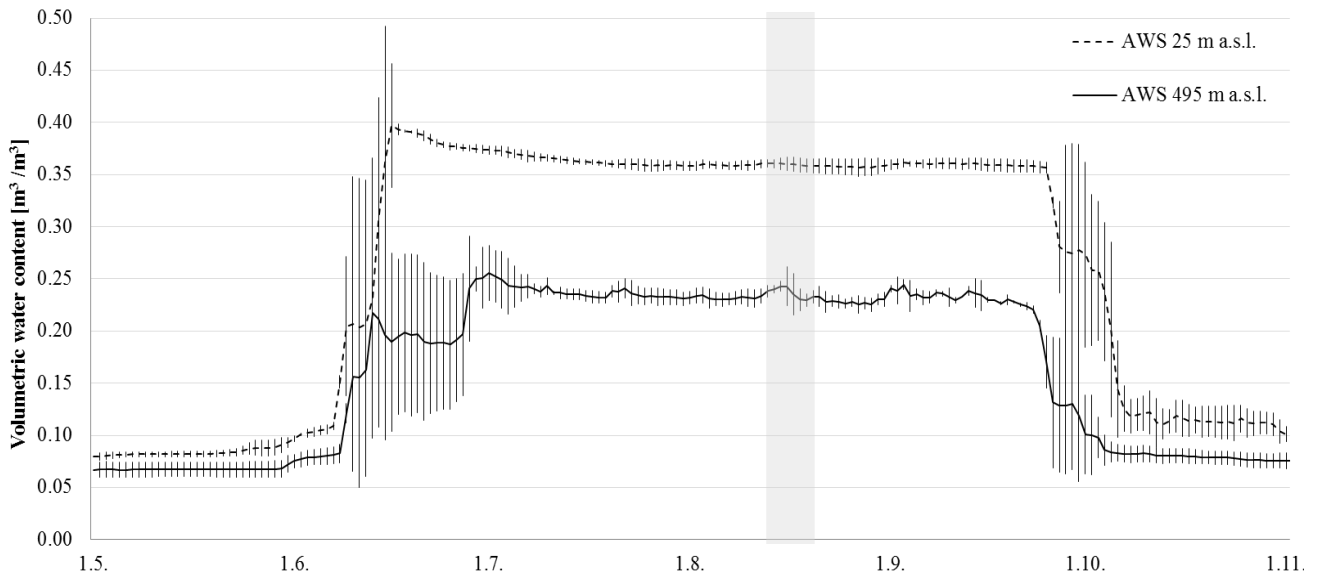

22  
23  
24  
25  
26  
27  
28  
29  
30  
31  
32  
33  
34  
35

Figure S3

37  
38  
39  
40  
41

Loading of soil geochemical properties (a), individual microbial PLFAs (mol% of PLFA) (b), and relative abundance of main microbial groups (c) determined in soils along the altitudinal gradients. Ordination diagrams show results of the redundancy analyses constrained by the effect of altitude. *Arrows* indicate the direction in which the respective parameter value increases. *Triangles* are centroids (n = 9) of the sites with corresponding elevation. The portion of variance explained by the respective axis is given in the axis title.

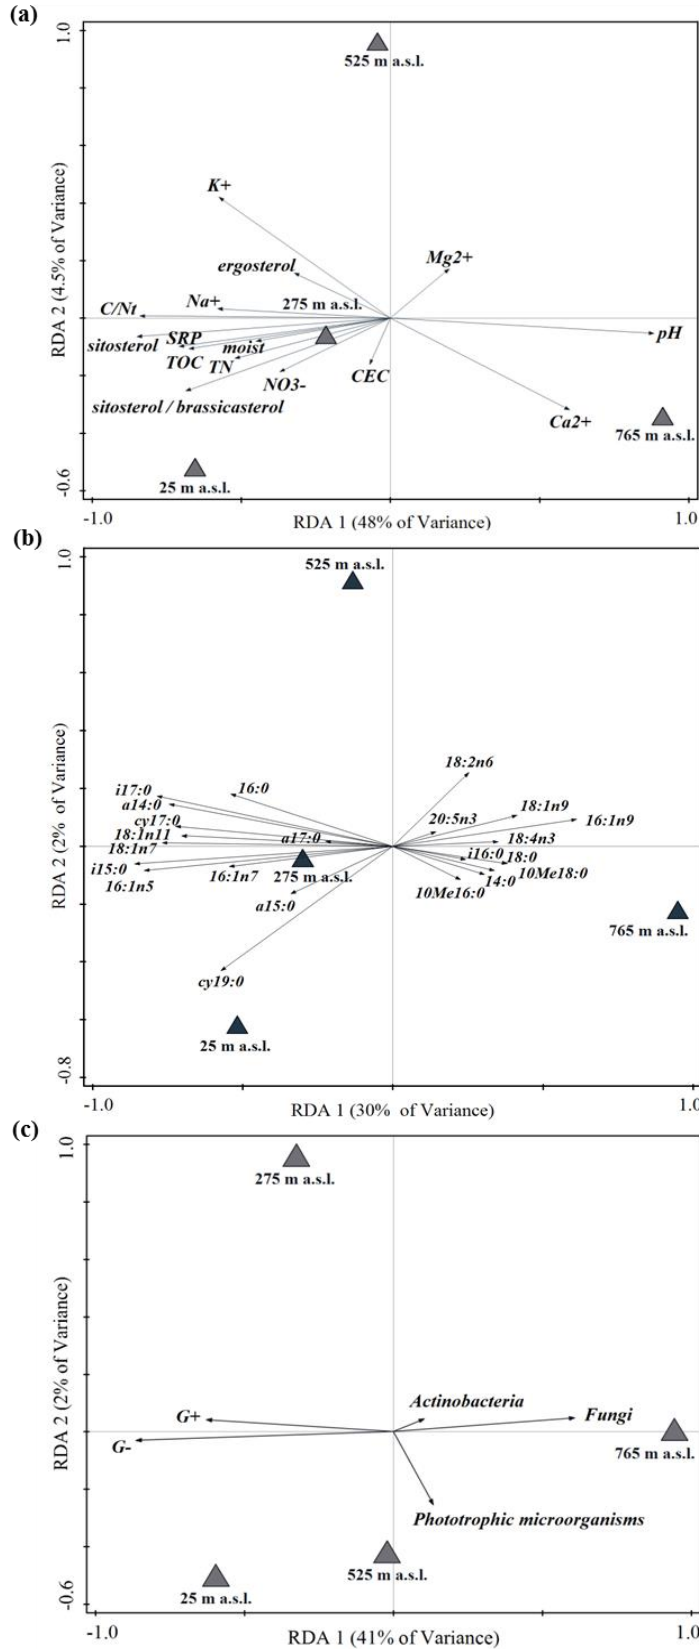

Supplement: Supplementary file 1 [file bg-2017-184-supplement.pdf]
